# Supplementary material for: Synergy of Oxygen Vacancy and Surface Modulation Endows Hollow Hydrangea-like MnCo2O4.5 with Enhanced Capacitive Performance
Source: MDPI journal article supplement (doi:10.3390/ijms25105075), 2024-05-07
Supplement: s1 [file s1]

# Synergy of Oxygen-Vacancy and Surface Modulation Endows hollow hydrangea-like $\text{MnCo}_2\text{O}_{4.5}$ with Exceptional capacitive performance

Gaofeng Li <sup>1</sup>, Yanyan Li <sup>1</sup>, Pengfei Wang <sup>2</sup>, Lingling Chen <sup>2</sup>, Longfei Li <sup>2</sup>, Chen Bao <sup>1</sup>, Jianfei Tu <sup>1</sup>, and Dianbo Ruan <sup>1,\*</sup>

<sup>1</sup> Institute of Advanced Energy Storage Technology and Equipment, Faculty of Mechanical Engineering and Mechanics, Ningbo University, Ningbo, 315211, People's Republic of China; ligao-feng@nbu.edu.cn

<sup>2</sup> Institute of Advanced Energy Storage Technology and Equipment, School of Materials Science and Chemical Engineering, Ningbo University, Ningbo, 315211, People's Republic of China

\* Correspondence: ruandianbo@nbu.edu.cn (D.R.); Tel.: 0574-87608848

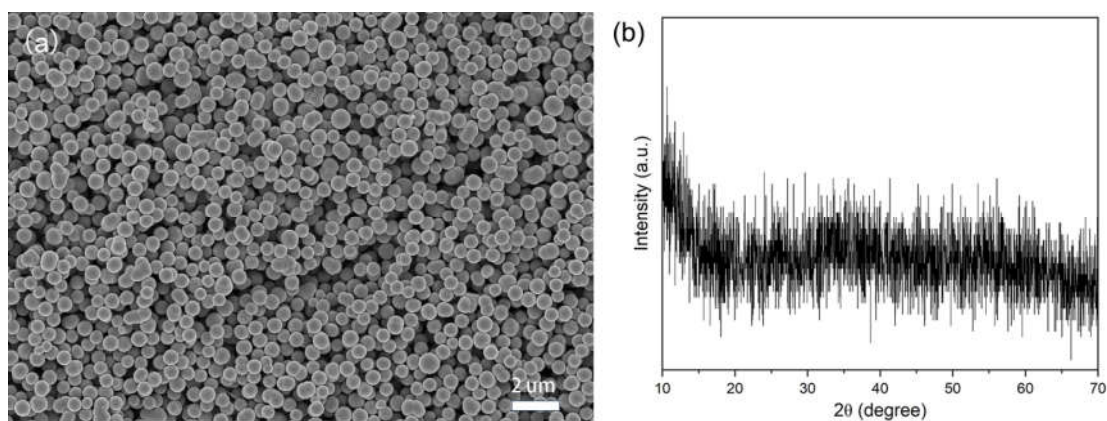

Figure S1. SEM (a) and XRD (b) image of MnCo glycerate solid sphere.

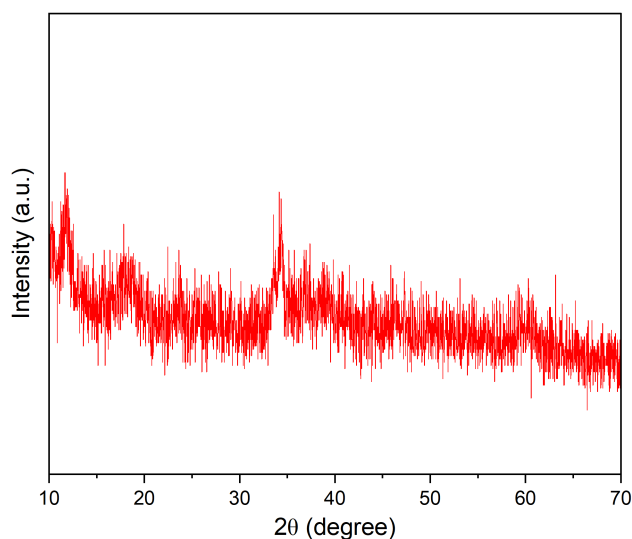

Figure S2. The XRD pattern of H-precursor treated by ethanol/water mixed solvent (1:1).

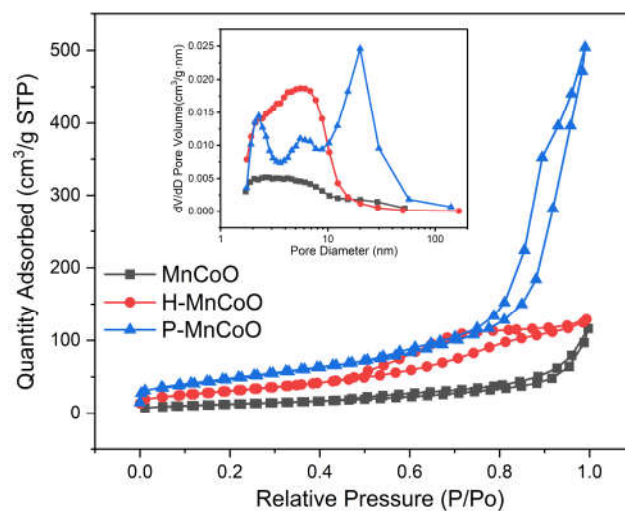

**Figure S3.** Nitrogen adsorption-desorption isotherms of three samples, inset is corresponding BJH plots.

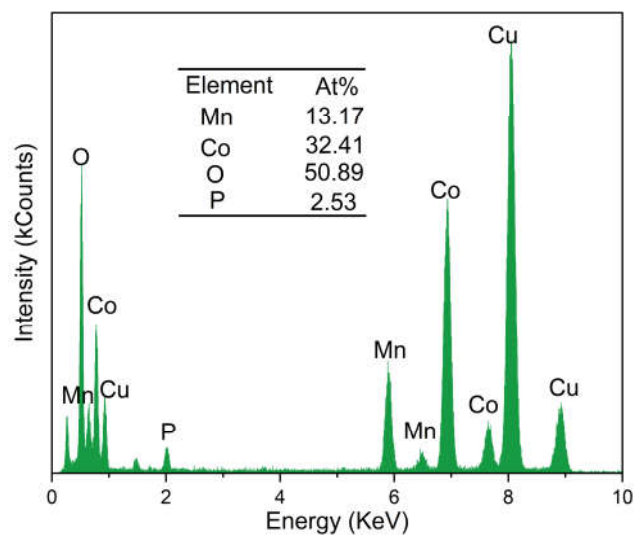

**Figure S4.** EDX spectra of P-MnCoO material.

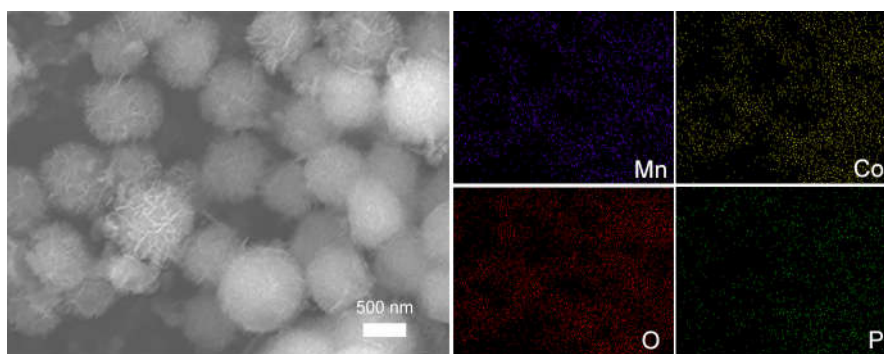

**Figure S5.** SEM image and corresponding EDX elemental mappings within several particles of P-MnCoO.

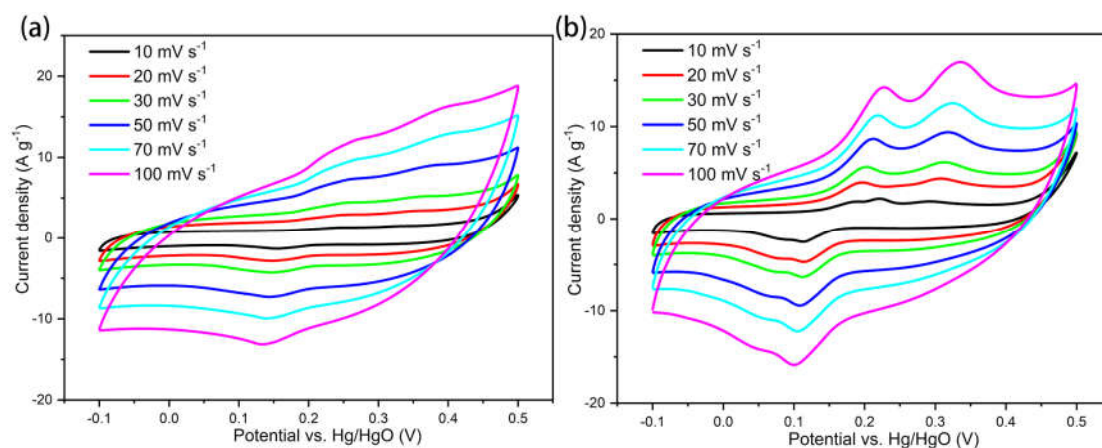

**Figure S6.** CV curves of (a) MnCoO and (b) H-MnCoO at various scan rates.

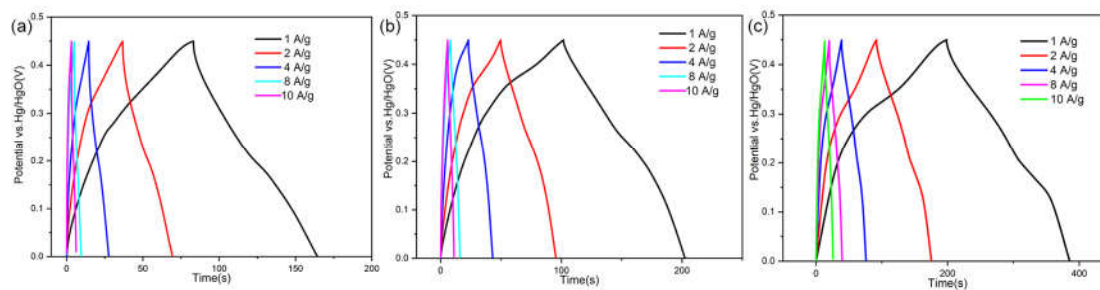

**Figure S7.** GCD curves of (a) MnCoO, (b) H-MnCoO and (c) P-MnCoO at different current densities.

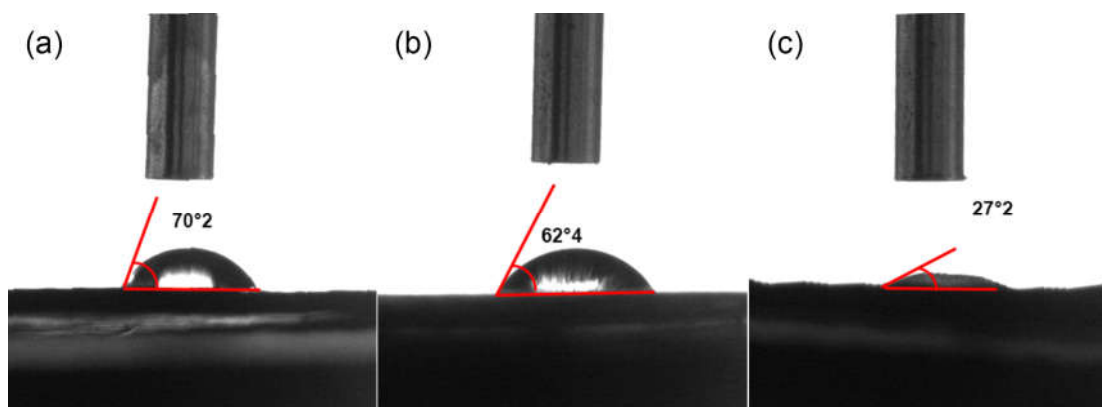

**Figure S8.** Water contact angle images of (a) MnCoO, (b) H-MnCoO and (c) P-MnCoO electrodes.

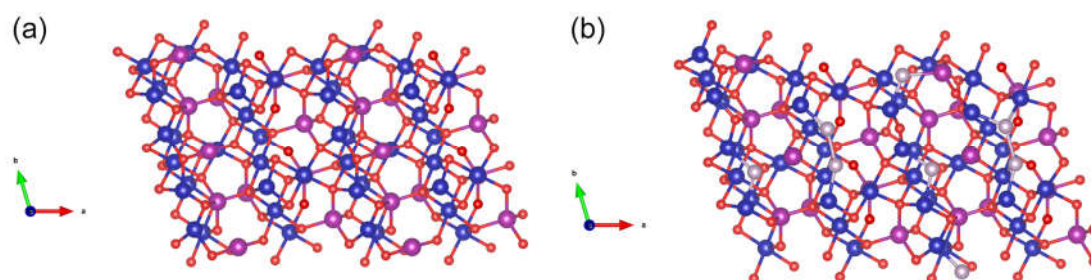

**Figure S9.** The crystallographic models of (a) MnCoO and (b) P-MnCoO electrodes.

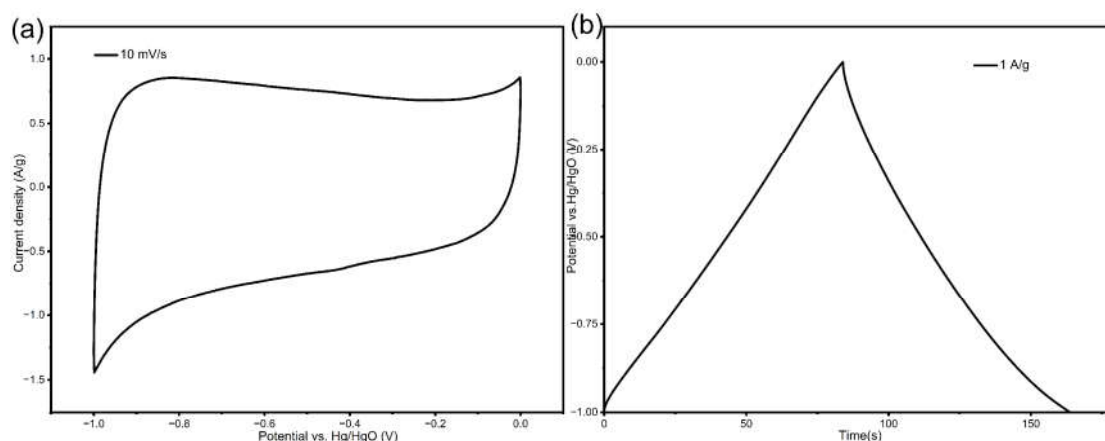

**Figure S10.** CV (a) and GCD curves (b) of AC electrode.

**Table S1**

Various pseudocapacitive electrodes in supercapacitors.

| Electrode materials                                                                     | Current density(A g <sup>-1</sup> ) | Capacitance (F g <sup>-1</sup> ) | Retention (Cycles) | Ref              |
|-----------------------------------------------------------------------------------------|-------------------------------------|----------------------------------|--------------------|------------------|
| MnCo <sub>2</sub> O <sub>4</sub> hollow microspheres                                    | 1                                   | 235.7                            | 93.6 % (2000)      | [S1]             |
| MnCo <sub>2</sub> O <sub>4.5</sub> spindle-like microstructures                         | 0.5                                 | 343                              | 81.3 % (5000)      | [S2]             |
| MnCo <sub>2</sub> O <sub>4.5</sub> /graphene composite                                  | 0.5                                 | 252.3                            | 92.6 %(1000)       | [S3]             |
| MnCo <sub>2</sub> O <sub>4.5</sub> nanowire                                             | 1                                   | 405                              | 91 %/(3000)        | [S4]             |
| MnCo <sub>2</sub> O <sub>4.5</sub> @NiCo <sub>2</sub> O <sub>4</sub> nanowire composite | 1                                   | 325                              | 70.5 %(3000)       | [S5]             |
| P-MnCoO hollow hydrangea-like structure                                                 | 1                                   | 425                              | 91.1 %(10000)      | <b>This work</b> |

## References

1. Che, H.; Liu, A.; Mu, J.; Wu, C.; Zhang, X. Template-free synthesis of novel flower-like MnCo<sub>2</sub>O<sub>4</sub> hollow microspheres for application in supercapacitors. *Ceram. Int.* **2016**, *42*, 2416-2424. 10.1016/j.ceramint.2015.10.041
2. Liao, F.; Han, X.; Zhang, Y.; Xu, C.; Chen, H. Solvothermal synthesis of porous MnCo<sub>2</sub>O<sub>4.5</sub> spindle-like microstructures as high-performance electrode materials for supercapacitors.

*Ceram. Int.* **2018**, *44*, 22622-22631. 10.1016/j.ceramint.2018.09.038

3. Li, Y.; Peng, X.; Xiang, J.; Yang, J. Synthesis of  $\text{MnCo}_2\text{O}_{4.5}$ /graphene composite as electrode material for supercapacitors. *Int. J. Electrochem. Sci.* **2017**, *12*, 10763-10772. 10.1016/j.ijechem.2017.11.063
4. Li, S.; Wang, J.; Wang, M.; Ni, Y.  $\text{MnCo}_2\text{O}_{4+x}$  nanowire arrays grown on carbon sponge: improved electrochemical and catalytic performances. *CrystEngComm*, **2019**, *21*, 403-410. 10.1039/C8CE01793J
5. Facile synthesis of manganese cobalt oxide/nickel cobalt oxide composites for high-performance supercapacitors. *Front. Chem.* **2019**, *6*, 661. 10.3389/fchem.2018.00661
